# Supplementary material for: Combined effect of physical activity and leisure time sitting on long-term risk of incident obesity and metabolic risk factor clustering
Source: PubMed Central journal article supplement (PMC4153972; doi:10.1007/s00125-014-3323-8), 2014-07-31
Supplement: 125_2014_3323_MOESM1_ESM.pdf [file 125_2014_3323_MOESM1_ESM.pdf]

**ESM Table 1:** Minimally adjusted separate associations of physical activity and leisure-time sitting level at baseline with incident obesity and incident metabolic risk factor clustering at follow-up

|                                          | <b>Incident obesity</b>        |                                 | <b>Incident metabolic risk factor clustering</b> |                                 |
|------------------------------------------|--------------------------------|---------------------------------|--------------------------------------------------|---------------------------------|
|                                          | Odds ratio (95% CI)            |                                 | Odds ratio (95% CI)                              |                                 |
|                                          | <b>After 5 years</b><br>n=3160 | <b>After 10 years</b><br>n=2778 | <b>After 5 years</b><br>n=2529                   | <b>After 10 years</b><br>n=2254 |
| <b><i>Physical activity level</i></b>    |                                |                                 |                                                  |                                 |
| <i>Low</i>                               | 1.00 (Reference)               | 1.00 (Reference)                | 1.00 (Reference)                                 | 1.00 (Reference)                |
| <i>Intermediate</i>                      | 0.71 (0.50, 1.01)              | 0.63 (0.45, 0.87)               | 0.76 (0.60, 0.97)                                | 0.75 (0.60, 0.94)               |
| <i>High</i>                              | 0.64 (0.44, 0.93)              | 0.63 (0.45, 0.88)               | 0.86 (0.67, 1.09)                                | 0.83 (0.66, 1.05)               |
| <i>P-trend</i>                           | 0.02                           | 0.01                            | 0.25                                             | 0.14                            |
| <b><i>Leisure-time sitting level</i></b> |                                |                                 |                                                  |                                 |
| <i>High</i>                              | 1.00 (Reference)               | 1.00 (Reference)                | 1.00 (Reference)                                 | 1.00 (Reference)                |
| <i>Intermediate</i>                      | 0.78 (0.55, 1.11)              | 0.93 (0.67, 1.28)               | 0.77 (0.62, 0.97)                                | 0.76 (0.61, 0.94)               |
| <i>Low</i>                               | 0.99 (0.69, 1.42)              | 1.08 (0.77, 1.51)               | 0.79 (0.62, 1.01)                                | 0.78 (0.62, 0.99)               |
| <i>P-trend</i>                           | 0.87                           | 0.74                            | 0.04                                             | 0.02                            |

Separate associations are mutually adjusted. Models adjusted for age, sex, and ethnicity.
