# Supplementary material for: Combined effect of physical activity and leisure time sitting on long-term risk of incident obesity and metabolic risk factor clustering
Source: PubMed Central journal article supplement (PMC4153972; doi:10.1007/s00125-014-3323-8), 2014-07-31
Supplement: 125_2014_3323_MOESM4_ESM.pdf [file 125_2014_3323_MOESM4_ESM.pdf]

**ESM Table 4:** Combined associations of physical activity and leisure-time sitting level at baseline with incident obesity and incident metabolic risk factor clustering at follow-up

**Change in number of metabolic risk factors**

Unstandardized B (95% CI)

|                                | <b>After 5 years</b><br>n=3670    |                     |                     |                | <b>After 10 years</b><br>n=3214   |                     |                    |                |
|--------------------------------|-----------------------------------|---------------------|---------------------|----------------|-----------------------------------|---------------------|--------------------|----------------|
|                                | <b>Model 1</b>                    |                     |                     |                |                                   |                     |                    |                |
|                                | <i>Leisure-time sitting level</i> |                     |                     |                | <i>Leisure-time sitting level</i> |                     |                    |                |
| <i>Physical activity level</i> | <i>High</i>                       | <i>Intermediate</i> | <i>Low</i>          | <i>P-trend</i> | <i>High</i>                       | <i>Intermediate</i> | <i>Low</i>         | <i>P-trend</i> |
| <i>Low</i>                     | 0.00 (Reference)                  | -0.12 (-0.27, 0.02) | 0.01 (-0.15, 0.17)  | 0.93           | 0.00 (Reference)                  | 0.02 (-0.15, 0.18)  | 0.04 (-0.13, 0.22) | 0.60           |
| <i>Intermediate</i>            | -0.08 (-0.23, 0.06)               | -0.08 (-0.22, 0.06) | -0.11 (-0.26, 0.04) | 0.67           | 0.08 (-0.08, 0.25)                | 0.01 (-0.15, 0.17)  | 0.09 (-0.08, 0.26) | 0.98           |
| <i>High</i>                    | -0.02 (-0.16, 0.12)               | -0.08 (-0.22, 0.07) | -0.05 (-0.21, 0.11) | 0.65           | 0.02 (-0.14, 0.18)                | 0.10 (-0.06, 0.26)  | 0.15 (-0.03, 0.33) | 0.11           |
| <i>P-trend</i>                 | 0.44                              | 0.74                | 0.90                |                | 0.85                              | 0.33                | 0.28               |                |
| <i>P-interaction</i>           |                                   | 0.78                |                     |                |                                   | 0.81                |                    |                |
|                                | <b>Model 2</b>                    |                     |                     |                |                                   |                     |                    |                |
|                                | <i>Leisure-time sitting level</i> |                     |                     |                | <i>Leisure-time sitting level</i> |                     |                    |                |
| <i>Physical activity level</i> | <i>High</i>                       | <i>Intermediate</i> | <i>Low</i>          | <i>P-trend</i> | <i>High</i>                       | <i>Intermediate</i> | <i>Low</i>         | <i>P-trend</i> |
| <i>Low</i>                     | 0.00 (Reference)                  | -0.12 (-0.26, 0.03) | 0.01 (-0.14, 0.17)  | 0.99           | 0.00 (Reference)                  | 0.03 (-0.13, 0.20)  | 0.05 (-0.13, 0.23) | 0.54           |
| <i>Intermediate</i>            | -0.08 (-0.22, 0.07)               | -0.08 (-0.22, 0.07) | -0.10 (-0.25, 0.05) | 0.81           | 0.10 (-0.07, 0.26)                | 0.02 (-0.14, 0.18)  | 0.11 (-0.06, 0.28) | 0.94           |
| <i>High</i>                    | -0.02 (-0.16, 0.13)               | -0.07 (-0.21, 0.08) | -0.04 (-0.20, 0.12) | 0.74           | 0.04 (-0.13, 0.20)                | 0.13 (-0.04, 0.29)  | 0.17 (-0.01, 0.35) | 0.10           |
| <i>P-trend</i>                 | 0.33                              | 0.56                | 0.57                |                | 0.90                              | 0.35                | 0.08               |                |
| <i>P-interaction</i>           |                                   | 0.46                |                     |                |                                   | 0.47                |                    |                |

**Model 1** adjusted for age, sex, and ethnicity. **Model 2** further adjusted for occupational position, frequency of fruit and vegetable consumption, smoking status, alcohol consumption, and the presence of a long-standing illness.
