# Supplementary material for: Combined effect of physical activity and leisure time sitting on long-term risk of incident obesity and metabolic risk factor clustering
Source: Springer Nature journal article supplement (doi:10.1007/s00125-014-3323-8), 2014-07-30
Supplement: MOESM2 [file 8092428]

**ESM Table 2:** Minimally adjusted combined associations of physical activity and leisure-time sitting level at baseline with incident obesity and incident metabolic risk factor clustering at follow-up

|                                |                   | <b>Incident obesity</b><br>Odds ratio (95% CI)                          |                   |                |                   |                                   |                   |                |  |
|--------------------------------|-------------------|-------------------------------------------------------------------------|-------------------|----------------|-------------------|-----------------------------------|-------------------|----------------|--|
|                                |                   | <b>After 5 years</b><br>n=3160                                          |                   |                |                   | <b>After 10 years</b><br>n=2778   |                   |                |  |
|                                |                   | <i>Leisure-time sitting level</i>                                       |                   |                |                   | <i>Leisure-time sitting level</i> |                   |                |  |
| <i>Physical activity level</i> | <i>High</i>       | <i>Intermediate</i>                                                     | <i>Low</i>        | <i>P-trend</i> | <i>High</i>       | <i>Intermediate</i>               | <i>Low</i>        | <i>P-trend</i> |  |
| <i>Low</i>                     | 1.00 (Reference)  | 0.62 (0.35, 1.11)                                                       | 1.12 (0.65, 1.93) | 0.64           | 1.00 (Reference)  | 0.88 (0.53, 1.47)                 | 1.30 (0.78, 2.17) | 0.26           |  |
| <i>Intermediate</i>            | 0.53 (0.29, 0.97) | 0.52 (0.29, 0.95)                                                       | 0.89 (0.52, 1.53) | 0.10           | 0.56 (0.32, 1.00) | 0.63 (0.37, 1.08)                 | 0.77 (0.45, 1.32) | 0.42           |  |
| <i>High</i>                    | 0.76 (0.43, 1.32) | 0.63 (0.35, 1.12)                                                       | 0.23 (0.10, 0.57) | 0.01           | 0.78 (0.46, 1.32) | 0.66 (0.39, 1.13)                 | 0.47 (0.24, 0.91) | 0.15           |  |
| <i>P-trend</i>                 | 0.29              | 0.86                                                                    | 0.001             |                | 0.28              | 0.41                              | 0.003             |                |  |
| <i>P-interaction</i>           |                   | 0.02                                                                    |                   |                |                   | 0.34                              |                   |                |  |
|                                |                   | <b>Incident metabolic risk factor clustering</b><br>Odds ratio (95% CI) |                   |                |                   |                                   |                   |                |  |
|                                |                   | <b>After 5 years</b><br>n=2529                                          |                   |                |                   | <b>After 10 years</b><br>n=2254   |                   |                |  |
|                                |                   | <i>Leisure-time sitting level</i>                                       |                   |                |                   | <i>Leisure-time sitting level</i> |                   |                |  |
| <i>Physical activity level</i> | <i>High</i>       | <i>Intermediate</i>                                                     | <i>Low</i>        | <i>P-trend</i> | <i>High</i>       | <i>Intermediate</i>               | <i>Low</i>        | <i>P-trend</i> |  |
| <i>Low</i>                     | 1.00 (Reference)  | 0.63 (0.42, 0.93)                                                       | 0.71 (0.47, 1.09) | 0.10           | 1.00 (Reference)  | 0.67 (0.46, 0.98)                 | 0.80 (0.53, 1.20) | 0.21           |  |
| <i>Intermediate</i>            | 0.74 (0.51, 1.09) | 0.52 (0.35, 0.78)                                                       | 0.50 (0.33, 0.76) | 0.05           | 0.80 (0.55, 1.15) | 0.52 (0.36, 0.76)                 | 0.53 (0.36, 0.78) | 0.03           |  |
| <i>High</i>                    | 0.67 (0.46, 0.97) | 0.67 (0.46, 0.98)                                                       | 0.67 (0.45, 1.01) | 0.99           | 0.71 (0.50, 1.03) | 0.67 (0.47, 0.97)                 | 0.64 (0.43, 0.95) | 0.56           |  |
| <i>P-trend</i>                 | 0.01              | 0.74                                                                    | 0.48              |                | 0.07              | 0.90                              | 0.65              |                |  |
| <i>P-interaction</i>           |                   | 0.41                                                                    |                   |                |                   | 0.56                              |                   |                |  |

Models adjusted for age, sex, and ethnicity.
