# Supplementary material for: Combined effect of physical activity and leisure time sitting on long-term risk of incident obesity and metabolic risk factor clustering
Source: Diabetologia. 2014 Jul 31;57(10):2048–56. doi: 10.1007/s00125-014-3323-8 (PMC4153972; doi:10.1007/s00125-014-3323-8)
Supplement: Supplementary file 3 — (PDF 167 kb) [file 125_2014_3323_MOESM3_ESM.pdf]

**ESM Table 3:** Separate associations of physical activity and leisure-time sitting level at baseline with change in number of metabolic risk factors at follow-up compared with baseline

| Change in number of metabolic risk factors |                         |                          |
|--------------------------------------------|-------------------------|--------------------------|
| Unstandardized B (95% CI)                  |                         |                          |
|                                            | After 5 years<br>n=3670 | After 10 years<br>n=3214 |
| <b>Model 1</b>                             |                         |                          |
| <i>Physical activity level</i>             |                         |                          |
| <i>Low</i>                                 | 0.00 (Reference)        | 0.00 (Reference)         |
| <i>Intermediate</i>                        | -0.05 (-0.14, 0.04)     | 0.04 (-0.06, 0.14)       |
| <i>High</i>                                | -0.01 (-0.10, 0.08)     | 0.07 (-0.04, 0.17)       |
| <i>P-trend</i>                             | 0.86                    | 0.21                     |
| <i>Leisure-time sitting level</i>          |                         |                          |
| <i>High</i>                                | 0.00 (Reference)        | 0.00 (Reference)         |
| <i>Intermediate</i>                        | -0.06 (-0.14, 0.03)     | 0.01 (-0.08, 0.11)       |
| <i>Low</i>                                 | -0.02 (-0.11, 0.07)     | 0.06 (-0.04, 0.16)       |
| <i>P-trend</i>                             | 0.59                    | 0.25                     |
| <b>Model 2</b>                             |                         |                          |
| <i>Physical activity level</i>             |                         |                          |
| <i>Low</i>                                 | 0.00 (Reference)        | 0.00 (Reference)         |
| <i>Intermediate</i>                        | -0.04 (-0.13, 0.05)     | 0.04 (-0.06, 0.14)       |
| <i>High</i>                                | -0.00 (-0.10, 0.09)     | 0.08 (-0.03, 0.18)       |
| <i>P-trend</i>                             | 0.96                    | 0.14                     |
| <i>Leisure-time sitting level</i>          |                         |                          |
| <i>High</i>                                | 0.00 (Reference)        | 0.00 (Reference)         |
| <i>Intermediate</i>                        | -0.06 (-0.14, 0.03)     | 0.02 (-0.08, 0.11)       |
| <i>Low</i>                                 | -0.01 (-0.10, 0.08)     | 0.07 (-0.04, 0.17)       |
| <i>P-trend</i>                             | 0.68                    | 0.21                     |

Separate associations are mutually adjusted. **Model 1** adjusted for age, sex, and ethnicity. **Model 2** further adjusted for occupational position, frequency of fruit and vegetable consumption, smoking status, alcohol consumption, and the presence of a long-standing illness.
